# Supplementary material for: Spatiotemporal kinetics of CAF-1-dependent chromatin maturation ensures transcription fidelity during S-phase
Source: HighWire-hosted journal article supplement (doi:10.1101/gr.278273.123), 2023-12-01
Supplement: Supplemental_Methods.pdf [file Supplemental_Methods.pdf]

## Supplemental Materials

### Supplemental Methods

#### *Sequence alignment*

All reads were aligned to the sacCer3/R61 version of the *S. cerevisiae* genome using Bowtie 0.12.7 (Langmead et al. 2009). Reads from nascent chromatin occupancy profiling were aligned in paired-end mode using the following Bowtie parameters: -n 2 -l 20 -m 1. RNA-seq reads were aligned in single-end mode with the following Bowtie parameters: -n 2 -l 20 -M 1.

#### *Analysis of chromatin organization*

For NCOP experiment analyses, biological replicates were merged and sampled to the same read depth for normalization. Autocorrelation function (ACF) analysis was performed to assess nucleosome organization for the first four nucleosomes (700 bp) in gene bodies downstream of the TSS. 4214 genes that have an open reading frame (ORF) longer than 700 bp and have an annotated TSS coordinate (Park et al. 2014) were selected for the ACF analysis. To calculate the ACF value, midpoint locations of nucleosome-sized reads between 140 bp and 180 bp in length were used to generate density estimates with a 30 bp bandwidth Gaussian kernel. The density estimates were used to determine the ACF value corresponding to the nucleosome periodicity lag of 172 bp (Gutiérrez et al. 2019) for each gene. ACF values from the mature chromatin of WT cells were used to select the top 50% of genes with regularly phased arrays of nucleosomes (Figure 1C).

#### *Analysis of nucleosome occupancy and assembly rate*

Nucleosome dyad positions were determined from the WT chase 40 minute sample, which were used as a reference for all downstream analyses. To identify the nucleosome dyad positions, nucleosome-sized reads were used to generate a density curve across the length of each chromosome with a 30 bp bandwidth Gaussian kernel. The density curve calculated from each chromosome was passed through the turnpoints function in R to determine peaks of the density curve, which were used as nucleosome dyad positions.

Nucleosome occupancy was calculated as the number of nucleosome-sized reads mapped to the 140 bp window centered around each nucleosome dyad. High-confidence nucleosomes were defined as nucleosomes with occupancy greater than the 25th percentile at the final time point in both WT and *cac1Δ* cells.

Assembly timing index (ATI) is used to assess the rate of maturation for individual nucleosomes. ATI is calculated as the inverse of the mean weighted sum of nucleosome occupancy at each time point ( $O_n$ ) (time points 1, 2, 3, 4, 5 represent pulse 5', chase 10', 15', 20', 40'):

$$ATI = 1 / \frac{\sum_{n=1}^5 n * O_n}{5}$$

### *Fragile nucleosomes*

To determine the positions of fragile nucleosomes, we used MNase-seq data generated with MNase concentrations of 200 U and 400 U (Chereji et al. 2017), and identified nucleosomes that existed in the 200 U sample but not in the 400 U sample. To do so, we first used RoboCOP (Mitra et al. 2021) to call nucleosomes separately in the 200 U sample and 400 U sample. Then, using the `match_pair_nucs()` function in RoboCOP, the nucleosomes called from the two samples were compared as follows: 1) If  $\text{prob}(\text{nuc200}) \geq 0.1$  and  $\text{prob}(\text{nuc400}) \geq 0.1$  and the two dyads were less than 73 bp apart, then the two nucleosomes were considered to be the same nucleosome. 2) If  $\text{prob}(\text{nuc200}) \geq 0.1$  or  $\text{prob}(\text{nuc400}) \geq 0.1$  and no other nucleosomes in the other data set with probability  $\geq 0.1$  were within 73 bp, the nucleosome is considered to be unique to the sample.

### *Genomic features of slow and fast nucleosomes*

A single intergenic region is defined as the region between two neighboring nonoverlapping ORFs. A nucleosome is considered to be located in a gene if the nucleosome dyad lies within the ORF of the gene.

To compute the dinucleotide frequency for the fast and slow nucleosomes, we first matched the dyad positions of fast and slow nucleosomes identified from this study to

nucleosome positions determined from chemical mapping (Brogaard et al. 2012) by finding their nearest counterparts. To be considered a match, the two dyads need to be less than 50 bp apart. Dinucleotide frequency was generated by aligning the matched nucleosome positions from chemical mapping to the *sacCer2* reference genome.

### *Analysis of subnucleosomal fragments*

An autocorrelation function was used to determine the phasing of the subnucleosomal fragments in the nascent chromatin of *cac1Δ* cells. Midpoints of subnucleosomal fragments located within the first 700 bp of each gene were used to generate ACF values corresponding to lags ranging from 20 bp to 200 bp. The phasing for subnucleosomal fragments in each gene is determined as the lag that maximizes the ACF value.

## References

- Brogaard K, Xi L, Wang J-P, Widom J. 2012. A map of nucleosome positions in yeast at base-pair resolution. *Nature* **486**: 496–501.
- Chereji RV, Ocampo J, Clark DJ. 2017. MNase-sensitive complexes in yeast: nucleosomes and non-histone barriers. *Mol Cell* **65**: 565–577.e3.
- Gutiérrez MP, MacAlpine HK, MacAlpine DM. 2019. Nascent chromatin occupancy profiling reveals locus- and factor-specific chromatin maturation dynamics behind the DNA replication fork. *Genome Res* **29**: 1123–1133.
- Langmead B, Trapnell C, Pop M, Salzberg SL. 2009. Ultrafast and memory-efficient alignment of short DNA sequences to the human genome. *Genome Biol* **10**: R25.
- Mitra S, Zhong J, Tran TQ, MacAlpine DM, Hartemink AJ. 2021. RoboCOP: jointly computing chromatin occupancy profiles for numerous factors from chromatin accessibility data. *Nucleic Acids Res* **49**: 7925–7938.
- Park D, Morris AR, Battenhouse A, Iyer VR. 2014. Simultaneous mapping of transcript ends at single-nucleotide resolution and identification of widespread promoter-associated non-coding RNA governed by TATA elements. *Nucleic Acids Res* **42**: 3736–3749.
